# Supplementary material
Source: PubMed Central journal article supplement (PMC4879383)
Supplement: AAC.03049-15_zac006165224so1.pdf [file AAC.03049-15_zac006165224so1.pdf]

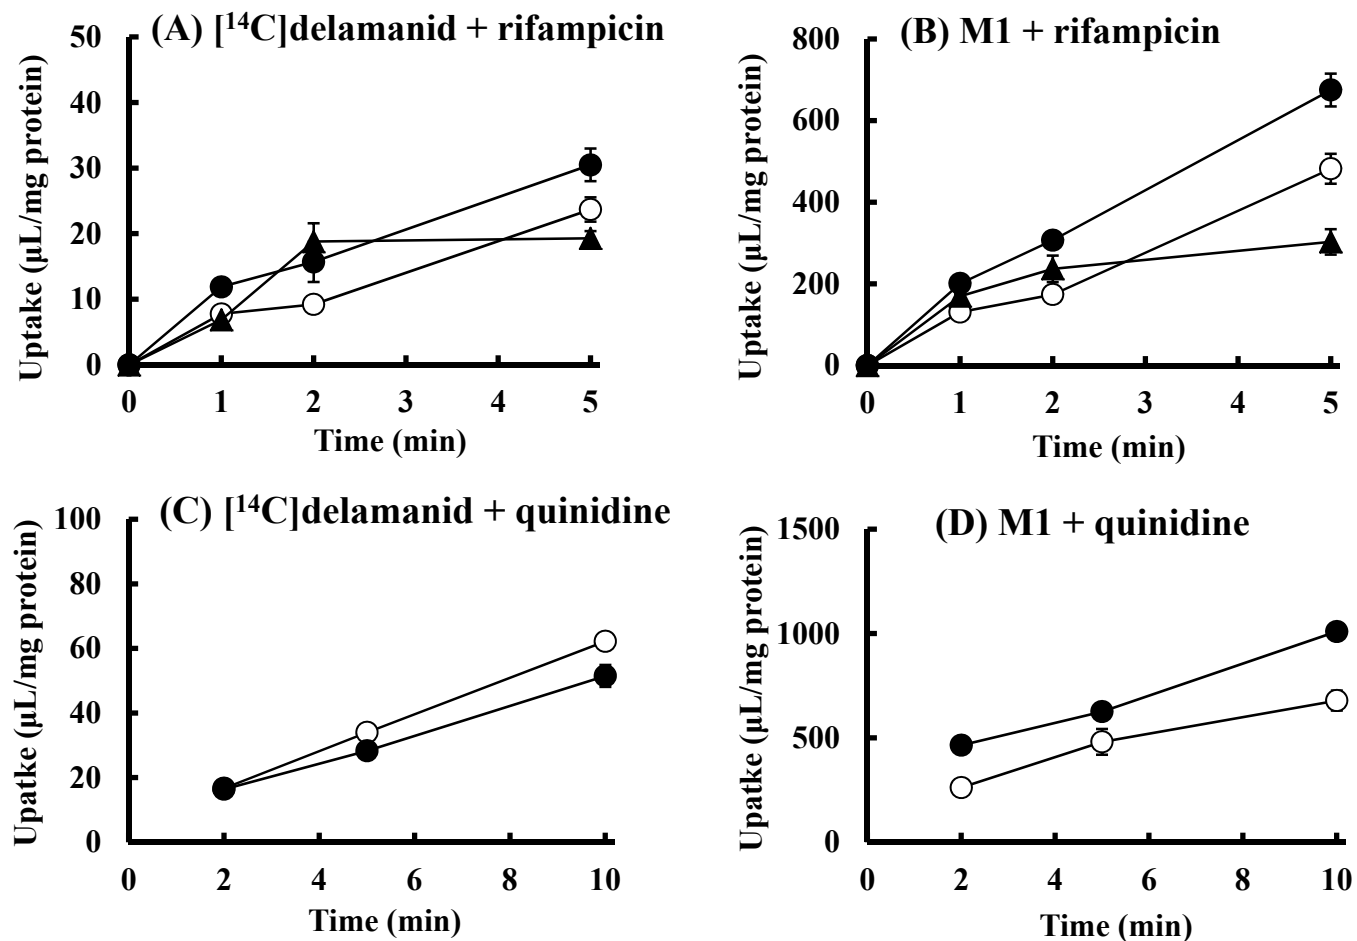

### Supplementary Figure 1

Time profiles of [<sup>14</sup>C]delamanid and metabolite M1 uptake into control HEK293 cells and OATP-expressing (A and B) or OCT1-expressing (C and D) HEK293 cells in the presence of inhibitor

The experiment was started by the addition of the substrate and inhibitor in BSA-free HBSS. (A, C): [<sup>14</sup>C]delamanid (1 µmol/L) and rifampicin (10 µmol/L) or quinidine (100 µmol/L); (B and D): M1 (1 µmol/L) and rifampicin or quinidine. Closed circles in (A and B): OATP1B1; Closed triangles in (A and B): OATP1B3; Closed circles in (C and D): OCT1; Open circles: control HEK293 cells. Data are expressed as the mean ± SD of triplicate determinations.
